# Supplementary material for: Targeting lung cancer stem-like cells with TRAIL gene armed oncolytic adenovirus
Source: PubMed Central journal article supplement (PMC4420595; doi:10.1111/jcmm.12397), 2015-02-16
Supplement: jcmm0019-0915-sd4.pdf [file jcmm0019-0915-sd4.pdf]

Tab. 1. Sequences of Primers

| Primers       | Sequences                         |
|---------------|-----------------------------------|
| ABCG2-forward | 5'-GTTCTCAGCAGCTCTTCGGCTT-3'      |
| ABCG2-reverse | 5'-TCCTCCAGACACACCACGGATA-3'      |
| MDR1-forward  | 5'-CATTGGTGTGGTGAGTCAG-3'         |
| MDR1-reverse  | 5'-GTCATAGGCATTGGCTTCC-3'         |
| MRP1-forward  | 5'-AAGACCAAGACGTATCAGGT-3'        |
| MRP1-reverse  | 5'-CAATGGTCACGTAGACGGCAA-3'       |
| GAPDH-forward | 5'-GTCTCCTCTGACTTCAACAGCG-3'      |
| GAPDH-reverse | 5'-ACCACCCTGTTGCTGTAGCCAA-3'      |
| E1A-forward   | 5'-TTCTCCGGAG CCGCCTCACCTTTC-3'   |
| E1A-reverse   | 5'-AGGCTCAGGTTTCAGACACAG-3'       |
| WT-forward    | 5'-AGAGCCCATGGAACCCGAGA-3'        |
| WT-reverse    | 5'-CATCGTACCTCAGCACCTTCCA-3'      |
| EGFP-forward  | 5'-CTAGAAGCTTATGGTGAGCAAGGGCG-3'  |
| EGFP-reverse  | 5'-ATCGGGATCCTTACTTGTACAGCTCG-3'  |
| TRAIL-forward | 5'-ATGCTTTAAAATGGCTATGATGGAGGT-3' |
| TRAIL-reverse | 5'-ATCGTTTAAATTAGCCAATAAAAAGG-3'  |
| Sox2-forward  | 5'-AAATGGGAGGGGTGCAAAGAGGAG-3'    |
| Sox2-reverse  | 5'-CAGCTGTCATTTGCTGTGGGTGATG-3'   |
| Nanog-forward | 5'-AGAAATCCCTTCCCTCGCCA-3'        |
| Nanog-reverse | 5'-TGGTAGAAGAATCAGGGCTG-3'        |
